# 1 Machine learning algorithms can predict tail biting 2 outbreaks in pigs using feeding behaviour records

3  
4  
5 Catherine Ollagnier<sup>1\*</sup>, Claudia Kasper<sup>2</sup>, Anna Wallenbeck<sup>3</sup>, Linda Keeling<sup>3</sup>, Giuseppe Bee<sup>1</sup>, Siavash A.  
6 Bigdeli<sup>4</sup>

7 <sup>1</sup> Swine Research Unit, Agroscope, Posieux, Fribourg, Switzerland

8 <sup>2</sup> Animal GenoPhenomics, Agroscope, Posieux, Fribourg, Switzerland

9 <sup>3</sup> Department of Animal Environment and Health, Swedish University of Agricultural Sciences, Ultuna,  
10 Uppsala, Sweden

11 <sup>4</sup> Edge Vision and AI, CSEM, Neuchâtel, Neuchâtel, Switzerland

12 \* Corresponding author

13 E-mail: [catherine.ollagnier@agroscope.admin.ch](mailto:catherine.ollagnier@agroscope.admin.ch) (CO)

## 15 Abstract

16 Tail biting is a damaging behaviour that impacts the welfare and health of pigs. Early detection of precursor sig  
17 outbreaks, using feeding behaviour data recorded by an electronic feeder. Prediction capacities of  
18 seven machine learning algorithms (Generalized Linear Model with Stepwise Feature Selection,  
19 random forest, Support Vector Machines with Radial Basis Function Kernel, Bayesian Generalized  
20 Linear Model, Neural network, K-nearest neighbour, and Partial Least Squares Discriminant Analysis)  
21 were evaluated from daily feeding data collected from 65 pens originating from two herds of grower-  
22 finisher pigs (25-100kg), in which 27 tail biting events occurred. Data were divided into training and  
23 testing data in two different ways, either by randomly splitting data into 75% (training set) and 25%  
24 (testing set), or by randomly selecting pens to constitute the testing set. In the first data splitting, the  
25 model is regularly updated with previous data from the pen, whereas in the second data splitting, the  
26 model tries to predict for a pen that it has never seen before. The K-nearest neighbour algorithm was  
27 able to predict 78% of the upcoming events with an accuracy of 96%, when predicting events in pens

28 for which it had previous data. The detection of events for unknown pens was less sensitive, and the  
29 neural network model was able to detect 14% of the upcoming events with an accuracy of 63%. Our  
30 results indicate that machine learning models can be considered for implementation into automatic  
31 feeder systems for real-time prediction of tail biting events.

## 32 **Introduction**

33 Tail biting (TB) is abnormal behaviour in pigs that is thought to have a multi-factorial origin. A  
34 lack of enrichment material, unfavourable environmental conditions, an unbalanced diet, or a poor  
35 health status could trigger it. In addition to the welfare and ethical concerns associated with this  
36 cannibalistic behaviour, TB events cause pain, trigger infections, impair growth and devalue the  
37 carcasses [1-5].

38 Routine tail docking is prohibited in Switzerland [6] and in the EU [7], and farmers are asked  
39 to set up measures to prevent TB outbreaks. One strategy is to pinpoint the farm-specific risk factors  
40 for TB and to find solutions to reduce them [4, 6]. Another strategy is to monitor animals' behaviours  
41 to detect early signs of forthcoming outbreaks [8-10]. Early identification of TB indicators is  
42 important for efficient intervention. The behavioural monitoring can be done at the pen and at the  
43 individual animal level. Identification at the individual animal level can support preventive measures  
44 such as removing the biter or the bitten pigs. Observations at the pen level are more efficient to  
45 detect the TB event [3].

46 To date, only a few behavioural indicators were studied at the pen level. Early indicators—  
47 such as changes in activity levels, tail posture, changes in exploratory behaviour, and drinking and  
48 feeding behaviours—can be observed up to 63 days before outbreaks occur, but observations are  
49 sometimes inconsistent. For instance, Statham et al. reported that pigs spend less time lying and  
50 more time standing and sitting within four days before an outbreak [11], but Wedin et al. did not  
51 observe this difference in postures [10]. Zonderland et al. reported decreasing exploratory behaviour  
52 six days before TB events [12], whereas Statham et al. observed increasing environmental

53 manipulations one day before [11]. In contrast, Ursinus et al. did not observe any change in  
54 explorative behaviour before TB events [13]. Larsen et al. detected a change in activity and object  
55 manipulation within the 7 days before an event [14]. A lower tail position seems also to indicate an  
56 outbreak, and several authors have reported an increased incidence of tucked or hanging tails in  
57 pens before and during TB outbreaks [8-11, 15]. Using automated analysis of camera recordings,  
58 D'Eath et al. and Liu et al. detected low tail posture, which was positively associated with more tail  
59 damage [8, 16]. Nonetheless, the tail posture may not specifically indicate a TB event, since low tail  
60 posture has also been associated with negative emotional responses in pigs [10], which could be  
61 caused by other factors like sickness. All of the above studies described behavioural changes when  
62 comparing a control (CTL) pen to a TB pen, which is the first step in developing of early detection of  
63 TB event. The statistical analyses identify significant changes in behaviour before and during a TB  
64 outbreak, but none of the authors attempted to use the detected differences to predict upcoming  
65 events. In addition, the behavioural traits monitored in the previous studies require regular  
66 observations or additional material (camera) to detect changes in behaviour, which is either time  
67 consuming or costly.

68         Nowadays, more and more pig farms are equipped with electronic feeding systems. The  
69 technology offers individually tailored feeding, reduces pigs feed usage, improves health and welfare,  
70 and reduces farm workload. Automatic pig feeding systems bring increased efficiency, convenience  
71 and control to the feeding process. Electronic feeding systems with single-spaced feeders also enable  
72 automatic monitoring of the feeding behaviours of each individual. Recording the identity of the pig,  
73 feeder entry and exit times and the amount of food consumed allows the calculation of the  
74 frequency of feeder visits per day, feeding rates, mean feeder occupation time, mean food intake per  
75 feeder visit, total food intake and total feeder duration per day for each pig. In 1994, Young and  
76 Lawrence found that pigs housed in groups and fed from automatic feeders showed a temporal  
77 pattern of feeding behaviour [17]. They also suggested that the feeding behaviour might be altered  
78 by social conditions. It has been later described that changes in feeding behaviours with automatic

79 feeders were associated with negative events like aggressive behaviour or disrupted social dynamics  
80 [8]. If a TB event can be predicted from behaviour, as postulated by Statham et al. [11], then data  
81 from electronic feeders could be used to monitor in real time the feeding behaviour of the pigs. In  
82 fact, the feeding behaviour of pigs assessed by electronic feeders appears to change before a TB  
83 event. Some studies describe changes in feeding behaviours before TB events [18-20]. These findings  
84 suggest that feeding behaviours recorded by electronic feeders could be a valid tool to detect early  
85 signs of a TB event. Indeed, Maselyne et al. developed an online warning system for individual  
86 fattening pigs based on their feeding pattern [21]. This study investigated whether abnormal changes  
87 in the feeding pattern can be detected automatically and used as an (early) indicator for health,  
88 welfare and productivity problems of an individual animal. They observed the number of feeder visits  
89 per day and the average time interval between two visits and determined a threshold above which  
90 the behaviour was considered abnormal. Every pig was categorised each day as 'green' (globally  
91 healthy), 'orange' or 'red' status (the latter including severe infection of the tail). However, the  
92 authors worked at the individual pig level and did not focus on TB detection at the pen level.

93 Different authors attempted to predict three behavioural changes (pen fouling, diarrhoea  
94 and TB) using multiple data types extracted from the pen [22-24]. A multivariate dynamic model  
95 and/or machine neural network and Bayesian ensemble were created by combining information  
96 from the drinking and feeding behaviours of pigs and the pen's environmental conditions. In these  
97 articles, the authors acknowledged that feed and water consumption are highly correlated [22] and  
98 that changes in water consumption are better predictors of behavioural changes than environmental  
99 parameters [24]. Due to a lack of TB data during the period of Jensen et al.'s analysis, the researchers  
100 were unable to predict TB event [23]. The aforementioned studies were limited by the fact that they  
101 rely on water/climate sensors, which are not routinely installed in farms. Further, the authors did not  
102 address whether their model could be generalized to another farm data set.

103 In our study, we used feeding behaviour data paired with machine learning (ML) algorithms  
104 to predict TB outbreaks in real time. The study's objectives are: 1) assessment of the impact of the

105 data framework on TB detection; 2) implementation and evaluation of the proposed framework on  
106 two different farm datasets; 3) assessment of a data-independent model; 4) evaluation of the  
107 framework's impact on TB detection.

108 In summary, the contributions of our research are:

- 109 1. Provide a new data framework to allow a ML approach to predict TB using feeding  
110 behaviour data;
- 111 2. Demonstrate that Machine Learning Models —Generalized Linear Model with  
112 Stepwise Feature Selection (glmnet), random forest (rf), Support Vector Machines with Radial Basis  
113 Function Kernel (svmRadial), Bayesian Generalized Linear Model (bayesglm), Neural network (nn), K-  
114 nearest neighbour (kNN), and Partial Least Squares Discriminant Analysis (pls)— can predict TB  
115 events using pigs' feeding behaviours at the pen level with the new data framework;
- 116 3. Simulate two conditions: one where the model has access to previous data of the  
117 pen, and another where the model makes predictions in one pen, based on data from other pens;
- 118 4. Achieve a prediction of 70- 80% of the upcoming TB events with a specificity of >99%  
119 (rf and kNN models), when the model has access to previous data of the pen, and
- 120 5. Evaluate and compare prediction performances in two different farm conditions.

121 A TB monitoring tool would open up new opportunities for the farmer to take targeted  
122 action in specific pens to prevent the TB event. Being able to prevent TB would serve the welfare of  
123 the animals and provide economic benefits to the farmer. Since the tool requires only data that are  
124 already available from pig farms equipped with automatic feeders, it could be easily implemented in  
125 commercial practice as an additional management tool.

## 126 **Material and methods**

### 127 **Data collection**

128           This study analyses the feeding behaviours of two herds of grower-finisher pigs weighing  
129 between 25 and 100 kilograms. One data set originates from a testing boar station in Sweden and  
130 contains data collected from October 2004 to July 2007. The data set comes from a previous  
131 retrospective study that Wallenbeck and Keeling published [20]. The second data set contains data  
132 from the experimental pig farm of Agroscope and comprises recordings from November 2018 to April  
133 2020. As tail docking is prohibited in Sweden and in Switzerland, the data are from pigs with intact  
134 tails.

135           The Swedish data set includes data from 42 pens (21 TB and 21 CTL) of boars (purebred  
136 Yorkshire, Landrace or Hampshire) recorded 70 days before and after the TB date. Boars were  
137 housed in groups of 7 to 14 animals per pen. Each pen measured 15.7 m<sup>2</sup> and had a slatted floor and  
138 plain resting area. All pigs had *ad libitum* access to the pelleted feed, which was optimised according  
139 to the Swedish nutrition norms for fattening pigs [25]. Water was provided *ad libitum* and straw was  
140 offered daily.

141           The Swiss data set consisted of 23 pens (six TB and 17 CTL) of females and castrated male  
142 pigs (Swiss Large White), recorded 100 days before and after the TB date. Twenty pens (18 m<sup>2</sup>)  
143 contained 11 to 15 pigs each and were equipped with two automatic feeders; three pens (78 m<sup>2</sup>)  
144 were equipped with eight automatic feeders for 31 to 55 pigs each. All pens had straw in racks and  
145 sawdust on the floor. Water was available *ad libitum* through nipple drinkers. The pelleted finisher  
146 diet was formulated to have 20% lower dietary crude protein and essential amino acids compared to  
147 a standard diet formulated according to the Swiss feeding recommendations for pigs [26].

148           For both study sites, data were collected by individual automatic feeders (ACEMO 48, Acemo,  
149 France; or MLP, Agrotronic Schauer, Austria) that recorded the number of visits to the feeder and the  
150 amount of feed consumed. The feeders were 0.6 m wide and 1.5-2.2 m long. Only one pig could

151 enter the feeder at a time, and other pigs could not dislodge the pig feeding inside the feeder. Each  
152 pig had access to only one feeder.

153 A pen was assigned to the TB category if at least one pig had to be treated for tail damages.  
154 The TB date (day 0) was defined as the date at which the first treatment was recorded. For the  
155 Swedish data set, each pen in the TB category was paired to a pen in the CTL category. For the Swiss  
156 data set, all the 23 farrowing batches reared under the same housing and feeding conditions were  
157 considered for analysis.

## 158 **Definitions of the observations, analysis in time series, and** 159 **missing value imputation**

160 The frequency of daily feeder visits (DFV), the daily feed consumption (DFC), and the  
161 standard deviation of the feed consumption at each visit (StdFC) were calculated per day and per pig  
162 (Table 1). These parameters were considered as ‘observations’ to predict TB events at the pen level  
163 and were derived from the data collected by the automatic feeder.

**Table 1. Observations used for tail biting predictions**

| Observations                                      | Definition                                                       | Units | Abbreviated |
|---------------------------------------------------|------------------------------------------------------------------|-------|-------------|
| <b>Frequency of daily feeder visits</b>           | Number of visits to the feeder (from 0:00 to 23:59:59 that date) | n     | DFV         |
| <b>Daily feed consumption</b>                     | Total feed consumption (from 0:00 to 23:59:59 that date)         | g     | DFC         |
| <b>Standard deviation of the feed consumption</b> | Daily standard deviation of the feed consumption at each visit   | g     | StdFC       |

164  
165 The time dependency of the observations was taken into account by analysing the data by  
166 groups of consecutive data points, called the ‘analysis window’. The prediction model considered the  
167 analysis window to achieve a prediction at the pen level. The analysis window was first defined to  
168 contain observations from 14 consecutive days (Fig 1). The A\_date was defined as the first day of the  
169 analysis window. The analysis window slides along the timeline and the A\_date defines the class of  
170 the analysis window, i.e., “TB” or “CTL”. Analysis windows from CTL pens were always classified as

171 “CTL”, whereas analysis windows from TB pens were considered as “TB” class only between day -35  
172 and day 10 (TB window). The analysis window of a TB pen was classified as “TB” if the A\_date was  
173 inside the TB window and “CTL”, if outside the TB window. Missing values were computed using  
174 median imputation (by data set) and a principal component analysis was performed before ML  
175 analysis.

176 **Fig 1. Analysis of the time dependency of the data thanks to the analysis window approach.**  
177 Analysis window slides along the timeline (blue arrow). The analysis window is classified as TB class,  
178 when the A\_date (first day of the analysis window) enters the TB window (orange block) and as CTL  
179 class when it is outside the TB window. Control pens are always classified as “CTL”.  
180

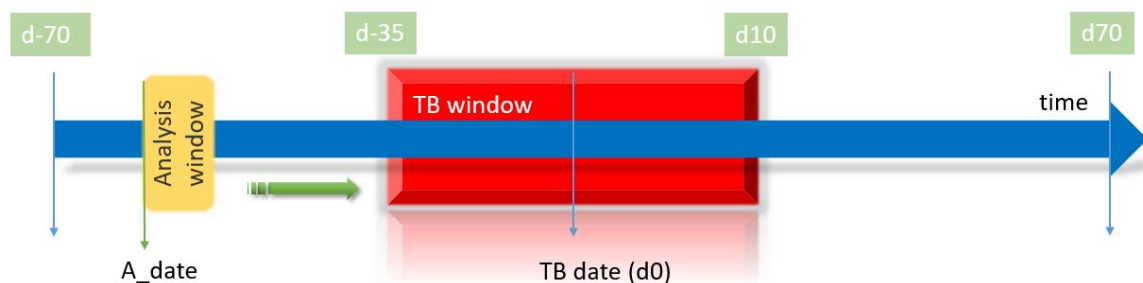

181

182 In each pen, the analysis window contained observations from 10 pigs for 14 days, to  
183 standardize the size of the analysis window. Observations from 10 pigs were considered to give  
184 enough information on the pen, without creating too many missing data points, for the few  
185 occurrences that contained fewer than 10 pigs.

186 At the end of the data framing, each analysis window contained 420 observations [3  
187 variables (DFV, DFC, StdFC)  $\times$  10 pigs  $\times$  14 days], and one outcome (the class of the window: TB or  
188 CTL). The Swiss and the Swedish data set were merged into a third data set, called Swedish+Swiss, to  
189 incorporate more diverse observations and further increase the model’s generalizability for unseen  
190 data (pen/country). In total, the combined data set (Swedish and Swiss data) contained 6605 analysis  
191 windows, with 5479 and 1126 CTL and TB windows, respectively. The characteristics of the TB  
192 windows compared to CTL are presented in Table 2.

193 **Table 2. Characteristics of the data sets.**



| Observations       | Statistics | Swedish |        | Swiss   |        |
|--------------------|------------|---------|--------|---------|--------|
|                    |            | CTL     | TB     | CTL     | TB     |
| DFC <sup>1</sup>   | Mean       | 2337.1* | 2005.7 | 2282.3* | 2438.8 |
|                    | SD         | 757.4   | 708.6  | 600.2   | 678.2  |
| DFV <sup>2</sup>   | Mean       | 24.9*   | 24.0   | 12.3*   | 12.0   |
|                    | SD         | 19.4    | 18.0   | 6.0     | 7.2    |
| StdFC <sup>3</sup> | Mean       | 128.6*  | 113.8  | 166.8*  | 195.6  |
|                    | SD         | 85.9    | 71.2   | 96.3    | 129.7  |

194 \*Significant difference between CTL and TB analysis window classes (p<0.0001)

195 <sup>1</sup> DFC: frequency of daily feeder visits

196 <sup>2</sup> DFV: daily feed consumption

197 <sup>3</sup> StdFC: standard deviation of the feed consumption at each visit.

198

## 199 Models

200

201 All data were analysed with R3.6.3, using the caret package to build ML models [27].

202 Commonly used classification ML methods were first tested on all three data sets (i.e., Swedish, Swiss

203 and Swedish+Swiss) [28, 29]. Table 3 presents a list of common ML methods considered and

204 implemented with R packages in this study with binary outcome.

205 **Table 3. The seven machine learning methods used to predict tail biting events from feeding**  
 206 **behaviour data.**

| Machine Learning                                          | R Package | Function  |
|-----------------------------------------------------------|-----------|-----------|
| Generalized Linear Model with Stepwise Feature Selection  | glmnet    | glmnet    |
| Random forest                                             | ranger    | rf        |
| Support Vector Machines with Radial Basis Function Kernel | kernlab   | svmRadial |
| Bayesian Generalized Linear Model                         | arm       | bayesglm  |
| Neural network                                            | nnet      | nn        |
| K-nearest neighbour                                       | caret     | kNN       |
| Partial Least Squares Discriminant Analysis               | pls       | pls       |

207

208 For each data set, predictive models were first trained on a subset of data (training set), and

209 the models' performances on this training set were then compared. The predictive performances of

210 the models were further compared using the unseen data (test set). The test set contained either

211 new unseen analysis windows (cross-validation (CV) approach) or new pens (leave one out cross-  
212 validation (LOOP) approach) [30]. The LOOP approach gives estimate metrics that are valuable when  
213 a new pen is presented to the model for prediction, as there is no pen overlapping between the  
214 training and testing data sets. This represents the situation where the farmer tries to predict a TB  
215 event in a hitherto unknown pen. The CV resampling approach predicts TB events based on data  
216 previously recorded in the pen. This approach is correct when the model can be continuously  
217 updated with previous records of the pen so that the prediction model already knows the feeding  
218 behaviour of the pen and tries to classify the analysis window of the testing set based on previous  
219 knowledge of this pen.

## 220 **Model evaluation: performances metrics**

221

222 This is a classification problem with binary outcomes (TB or CTL), and performances of the  
223 models should be assessed on parameters calculated with a confusion matrix [31]. Performance  
224 metrics definitions and confusion matrix are presented in Table 4. The sensitivity (rate of predicted  
225 TB class given the actual TB class) assesses the capacity of the model to detect an upcoming TB  
226 event. The positive predictive value (PPV) evaluates the capacity of the model to correctly predict a  
227 TB class. All models were optimized to maximize the sensitivity, as this study aimed to detect early  
228 warnings of TB events. The specificity (rate of predicted CTL given the actual CTL class) assesses the  
229 capacity of the model to detect a normal behaviour. The kappa statistic assesses how the model  
230 outperforms a random model that simply always predicts “CTL”. According to Landis and Koch, a  
231 kappa of 0-0.20 is slight, 0.21-0.40 is fair, 0.41-0.60 is moderate, 0.61-0.80 is substantial, and 0.81-1  
232 is almost perfect [32]. The  $p$ -value assesses the statistical significance of the difference in accuracy  
233 between the random model and the tested model.

234 **Table 4. The confusion matrix and performances metrics used to assess the performances of the**  
 235 **models**  
 236 A confusion matrix was applied to evaluate the prediction performances of the ML models for this  
 237 classification problem with a binary outcome (tail biting, "TB" or control "CTL" class). The definitions  
 238 of the performances metrics are presented.

|           |     | Actual                                                                                               |                                                                                         |
|-----------|-----|------------------------------------------------------------------------------------------------------|-----------------------------------------------------------------------------------------|
|           |     | TB                                                                                                   | CTL                                                                                     |
| Predicted | TB  | <b>TP</b><br><b>True positive</b><br>predicted TB class that are actually<br>TB class                | <b>FP</b><br><b>False-positive</b><br>predicted TB class that are actually CTL<br>class |
|           | CTL | <b>FN</b><br><b>False-negative</b><br>TB class not detected by the model<br>(predicted as CTL class) | <b>TN</b><br><b>True negative</b><br>predicted CTL class that are actually CTL<br>class |

**Performances Metrics**

(TP, FP FN and TN are defined above)

$$Sensitivity = \frac{TP}{TP + FN} \quad (1)$$

$$Positive Predicted Value (PPV) = \frac{TP}{TP + FP} \quad (2)$$

$$Specificity = \frac{TN}{TN + FP} \quad (3)$$

$$Accuracy = \frac{TN + TP}{TN + FP + TP + FN} \quad (4)$$

*P-value*: statistical significance of the difference with a random model always predicting CTL class.

$$K = \frac{p_o - p_e}{1 - p_e} \quad \text{where } p_o \text{ is the observed accuracy, and } \quad (5)$$

$p_e$  is the expected accuracy of a random model always predicting CTL class.

239

## 240 Results

### 241 Model performances

242

243 Table 5 presents the model performances on the three training data sets. All models

244 performed significantly better than the random prediction model (that simply always predict CTL),

245 with kappas ranging from 0.30 to 1.00. Even if the criteria for optimization was the sensitivity, this  
 246 performance criterion was always lower or equal to the specificity, which is most likely due to the  
 247 imbalance between the numerous CTL and the rare TB classes.

248 **Table 5. Models performances on training data sets for the Swiss, Swedish and Swedish+Swiss data**  
 249 **sets.**

| Swedish                |             |             |             |             |             |                   |
|------------------------|-------------|-------------|-------------|-------------|-------------|-------------------|
| Models                 | Accuracy    | Sensitivity | Specificity | PPV         | Kappa       | p-value           |
| glmnet <sup>1</sup>    | 0.88        | 0.63        | 0.94        | 0.76        | 0.61        | <0.0001           |
| <b>rf<sup>2</sup></b>  | <b>1.00</b> | <b>1.00</b> | <b>1.00</b> | <b>1.00</b> | <b>1.00</b> | <b>&lt;0.0001</b> |
| svmRadial <sup>3</sup> | 0.94        | 0.80        | 0.98        | 0.90        | 0.81        | <0.0001           |
| bayesglm <sup>4</sup>  | 0.88        | 0.63        | 0.94        | 0.76        | 0.61        | <0.0001           |
| <b>nn<sup>5</sup></b>  | <b>1.00</b> | <b>1.00</b> | <b>1.00</b> | <b>1.00</b> | <b>1.00</b> | <b>&lt;0.0001</b> |
| <b>kNN<sup>6</sup></b> | <b>0.99</b> | <b>0.99</b> | <b>0.99</b> | <b>0.98</b> | <b>0.98</b> | <b>&lt;0.0001</b> |
| pls <sup>7</sup>       | 0.87        | 0.52        | 0.96        | 0.79        | 0.56        | <0.0001           |
| Swiss                  |             |             |             |             |             |                   |
| Models                 | Accuracy    | Sensitivity | Specificity | PPV         | Kappa       | p-value           |
| glmnet                 | 0.92        | 0.40        | 0.99        | 0.79        | 0.50        | <0.0001           |
| <b>rf</b>              | <b>1.00</b> | <b>1.00</b> | <b>1.00</b> | <b>1.00</b> | <b>1.00</b> | <b>&lt;0.0001</b> |
| svmRadial              | 0.99        | 0.88        | 1.00        | 1.00        | 0.93        | <0.0001           |
| bayesglm               | 0.93        | 0.41        | 0.99        | 0.78        | 0.50        | <0.0001           |
| <b>nn</b>              | <b>0.99</b> | <b>0.98</b> | <b>0.99</b> | <b>0.96</b> | <b>0.97</b> | <b>&lt;0.0001</b> |
| kNN                    | 0.95        | 0.54        | 1.00        | 0.98        | 0.67        | <0.0001           |
| pls                    | 0.91        | 0.19        | 1.00        | 0.96        | 0.30        | <0.0001           |
| Swedish + Swiss        |             |             |             |             |             |                   |
| Models                 | Accuracy    | Sensitivity | Specificity | PPV         | Kappa       | p-value           |
| glmnet                 | 0.86        | 0.30        | 0.97        | 0.67        | 0.35        | <0.0001           |
| <b>rf</b>              | <b>1.00</b> | <b>1.00</b> | <b>1.00</b> | <b>1.00</b> | <b>1.00</b> | <b>&lt;0.0001</b> |
| svmRadial              | 1.00        | 0.99        | 1.00        | 1.00        | 1.00        | <0.0001           |
| bayesglm               | 0.86        | 0.30        | 0.97        | 0.67        | 0.35        | <0.0001           |
| nn                     | 0.97        | 0.87        | 0.99        | 0.97        | 0.90        | <0.0001           |
| kNN                    | 0.97        | 0.82        | 1.00        | 0.98        | 0.88        | <0.0001           |
| pls                    | 0.85        | 0.13        | 0.99        | 0.75        | 0.18        | <0.0001           |

250 Models in bold are considered as the best predictive models.

251 <sup>1</sup>Generalized Linear Model with Stepwise Feature Selection; <sup>2</sup>Random forest; <sup>3</sup>Support Vector Machines with Radial Basis Function Kernel;

252 <sup>4</sup>Bayesian Generalized Linear Model; <sup>5</sup>Neural network; <sup>6</sup>K-nearest neighbor; <sup>7</sup>Partial Least Squares Discriminant Analysis

253

## 254 **Model prediction performances**

255

256 Tables 6 and 7 summarize the performances of the models to predict unseen analysis

257 windows (CV) or unseen pens (LOOP), respectively. For the Swedish+Swiss data set, the

258 performances of the model on CV and LOOP were assessed on the combined testing set

259 (Swedish+Swiss) and on subsets of the Swedish or Swiss data set separately. The RF model showed

260 the best predictive performances on both the unseen analysis windows and the unseen pens, with an

261 average accuracy of 84% and a sensitivity of 38% on all data sets. Predictive performances were  
262 higher on unseen analysis windows than on unseen pens, and always lower than the model  
263 performances on the training set. In the Swedish data set, the predictive performances of the RF  
264 model on unseen pens were poor ( $\kappa < 0$ ). Models trained on the Swedish+Swiss data set showed  
265 a poorer performance (low  $\kappa$ ) in predicting new analysis windows of a Swedish or Swiss subset  
266 data set than the same model trained on the Swedish or Swiss data sets individually. Lower  $\kappa$ s  
267 were also obtained for prediction on new pens—except for glmnet, bayesglm, and pls models—that  
268 had improved predictive performances ( $\kappa$ ) on the Swiss subset.

269 **Table 6. Performances of models to predict unseen analysis windows [Cross Validation (CV)**  
 270 **approach] of the Swedish, Swiss and Swedish+Swiss testing data sets.**  
 271

| Swedish                |                      |             |             |             |             |                   |         |
|------------------------|----------------------|-------------|-------------|-------------|-------------|-------------------|---------|
| Models                 | Accuracy             | Sensitivity | Specificity | PPV         | Kappa       | p value           |         |
| glmnet <sup>1</sup>    | 0.80                 | 0.45        | 0.90        | 0.57        | 0.38        | 0.04              |         |
| <b>rf<sup>2</sup></b>  | <b>0.95</b>          | <b>0.80</b> | <b>0.99</b> | <b>0.98</b> | <b>0.85</b> | <b>&lt;0.0001</b> |         |
| svmRadial <sup>3</sup> | 0.86                 | 0.54        | 0.95        | 0.75        | 0.54        | <0.0001           |         |
| bayesglm <sup>4</sup>  | 0.81                 | 0.45        | 0.90        | 0.57        | 0.39        | 0.04              |         |
| nn <sup>5</sup>        | 0.87                 | 0.70        | 0.91        | 0.70        | 0.62        | <0.0001           |         |
| <b>kNN<sup>6</sup></b> | <b>0.97</b>          | <b>0.94</b> | <b>0.98</b> | <b>0.94</b> | <b>0.92</b> | <b>&lt;0.0001</b> |         |
| pls <sup>7</sup>       | 0.81                 | 0.36        | 0.93        | 0.60        | 0.35        | -                 |         |
| Swiss                  |                      |             |             |             |             |                   |         |
| Models                 | Accuracy             | Sensitivity | Specificity | PPV         | Kappa       | p-value           |         |
| glmnet                 | 0.85                 | 0.22        | 0.94        | 0.30        | 0.17        | -                 |         |
| <b>rf</b>              | <b>0.94</b>          | <b>0.50</b> | <b>0.99</b> | <b>0.95</b> | <b>0.63</b> | <b>&lt;0.0001</b> |         |
| svmRadial              | 0.91                 | 0.28        | 1.00        | 0.92        | 0.39        | 0.006             |         |
| bayesglm               | 0.85                 | 0.22        | 0.93        | 0.30        | 0.17        | -                 |         |
| <b>nn</b>              | <b>0.89</b>          | <b>0.47</b> | <b>0.95</b> | <b>0.54</b> | <b>0.44</b> | -                 |         |
| <b>kNN</b>             | <b>0.93</b>          | <b>0.41</b> | <b>1.00</b> | <b>1.00</b> | <b>0.55</b> | <b>&lt;0.0001</b> |         |
| pls                    | 0.89                 | 0.11        | 0.99        | 0.56        | 0.15        | -                 |         |
| Swedish + Swiss        |                      |             |             |             |             |                   |         |
| Models                 | Accuracy             | Sensitivity | Specificity | PPV         | Kappa       | p-value           |         |
| Glmnet <sup>a</sup>    | 0.82                 | 0.15        | 0.96        | 0.43        | 0.15        | -                 |         |
| rf <sup>a</sup>        | Swedish <sup>b</sup> | 0.77        | 0.21        | 0.93        | 0.46        | 0.18              | -       |
|                        | Swiss <sup>c</sup>   | 0.88        | 0.02        | 0.99        | 0.20        | 0.02              | -       |
| svmRadial <sup>a</sup> | Swedish <sup>b</sup> | 0.95        | 0.80        | 0.99        | 0.95        | 0.83              | <0.0001 |
|                        | Swiss <sup>c</sup>   | 0.94        | 0.48        | 1.00        | 1.00        | 0.62              | <0.0001 |
| bayesglm <sup>a</sup>  | Swedish <sup>b</sup> | 0.88        | 0.38        | 0.98        | 0.80        | 0.46              | <0.0001 |
|                        | Swiss <sup>c</sup>   | 0.86        | 0.48        | 0.97        | 0.80        | 0.52              | <0.0001 |
| nn <sup>a</sup>        | Swedish <sup>b</sup> | 0.90        | 0.16        | 1.00        | 0.76        | 0.23              | -       |
|                        | Swiss <sup>c</sup>   | 0.82        | 0.16        | 0.96        | 0.43        | 0.15              | -       |
| kNN <sup>a</sup>       | Swedish <sup>b</sup> | 0.88        | 0.55        | 0.94        | 0.67        | 0.53              | <0.0001 |
|                        | Swiss <sup>c</sup>   | 0.87        | 0.63        | 0.94        | 0.75        | 0.61              | <0.0001 |
| pls <sup>a</sup>       | Swedish <sup>b</sup> | 0.88        | 0.37        | 0.95        | 0.47        | 0.35              | -       |
|                        | Swiss <sup>c</sup>   | 0.96        | 0.78        | 1.00        | 0.98        | 0.84              | <0.0001 |
| pls <sup>a</sup>       | Swedish <sup>b</sup> | 0.96        | 0.87        | 0.98        | 0.94        | 0.88              | <0.0001 |
|                        | Swiss <sup>c</sup>   | 0.92        | 0.32        | 1.00        | 1.00        | 0.46              | 0.0006  |
| pls <sup>a</sup>       | Swedish <sup>b</sup> | 0.83        | 0.06        | 0.99        | 0.62        | 0.09              | -       |
|                        | Swiss <sup>c</sup>   | 0.79        | 0.09        | 0.98        | 0.62        | 0.11              | -       |
| pls <sup>a</sup>       | Swedish <sup>b</sup> | 0.89        | 0.00        | 1.00        | 0.00        | 0.00              | -       |
|                        | Swiss <sup>c</sup>   | 0.89        | 0.00        | 1.00        | 0.00        | 0.00              | -       |

272 Models in bold are considered as the best predictive models.

273 <sup>1</sup>Generalized Linear Model with Stepwise Feature Selection; <sup>2</sup>Random forest; <sup>3</sup>Support Vector Machines with Radial Basis Function Kernel;

274 <sup>4</sup>Bayesian Generalized Linear Model; <sup>5</sup>Neural network; <sup>6</sup>K-nearest neighbour; <sup>7</sup>Partial Least Squares Discriminant Analysis

275 <sup>a</sup>Prediction performances of the models on testing data set containing Swedish and Swiss data.

276 <sup>b</sup>Prediction performances of the models on the Swedish subset of the testing data set.

277 <sup>c</sup>Prediction performances of the models on the Swiss subset of the testing data set.

278

279 **Table 7. Performances of models to predict unseen pens [Leave one out cross-validation (LOOP)**  
 280 **approach] of the Swedish, Swiss and Swedish+Swiss data sets.**

| Swedish                |                      |             |             |             |                 |         |       |
|------------------------|----------------------|-------------|-------------|-------------|-----------------|---------|-------|
| Models                 | Accuracy             | Sensitivity | Specificity | PPV         | Kappa           | p-value |       |
| glmnet <sup>1</sup>    | 0.56                 | 0.14        | 0.71        | 0.14        | <0.00           | -       |       |
| <b>rf<sup>2</sup></b>  | <b>0.63</b>          | <b>0.11</b> | <b>0.81</b> | <b>0.17</b> | <b>&lt;0.00</b> | -       |       |
| svmRadial <sup>3</sup> | 0.54                 | 0.20        | 0.66        | 0.17        | <0.00           | -       |       |
| bayesglm <sup>4</sup>  | 0.56                 | 0.14        | 0.71        | 0.14        | <0.00           | -       |       |
| nn <sup>5</sup>        | 0.56                 | 0.05        | 0.73        | 0.06        | <0.00           | -       |       |
| kNN <sup>6</sup>       | 0.62                 | 0.00        | 0.83        | 0.00        | <0.00           | -       |       |
| pls <sup>7</sup>       | 0.58                 | 0.10        | 0.75        | 0.12        | <0.00           | -       |       |
| Swiss                  |                      |             |             |             |                 |         |       |
| Models                 | Accuracy             | Sensitivity | Specificity | PPV         | Kappa           | p-value |       |
| glmnet                 | 0.82                 | 0.18        | 0.96        | 0.50        | 0.19            | -       |       |
| <b>rf</b>              | <b>0.84</b>          | <b>0.18</b> | <b>0.99</b> | <b>0.75</b> | <b>0.24</b>     | -       |       |
| svmRadial              | 0.81                 | 0.02        | 0.99        | 0.25        | 0.01            | -       |       |
| bayesglm               | 0.82                 | 0.18        | 0.95        | 0.47        | 0.18            | -       |       |
| nn                     | 0.75                 | 0.04        | 0.90        | 0.09        | <0.00           | -       |       |
| <b>kNN</b>             | <b>0.84</b>          | <b>0.12</b> | <b>0.99</b> | <b>0.86</b> | <b>0.18</b>     | -       |       |
| pls                    | 0.82                 | 0.08        | 0.99        | 0.57        | 0.10            | -       |       |
| Swedish + Swiss        |                      |             |             |             |                 |         |       |
| Models                 | Accuracy             | Sensitivity | Specificity | PPV         | Kappa           | p-value |       |
| Glmnet <sup>a</sup>    | 0.73                 | 0.12        | 0.90        | 0.27        | 0.03            | -       |       |
|                        | Swedish <sup>b</sup> | 0.62        | 0.00        | 0.84        | 0.00            | <0.00   | -     |
|                        | Swiss <sup>c</sup>   | 0.87        | 0.37        | 0.99        | 0.86            | 0.45    | 0.008 |
| rf <sup>a</sup>        | 0.74                 | 0.00        | 0.96        | 0.00        | <0.00           | -       |       |
|                        | Swedish <sup>b</sup> | 0.69        | 0.00        | 0.93        | 0.00            | <0.00   | -     |
|                        | Swiss <sup>c</sup>   | 0.82        | 0.00        | 1.00        | 0               | 0       | -     |
| svmRadial <sup>a</sup> | 0.71                 | 0.03        | 0.91        | 0.08        | <0.00           | -       |       |
|                        | Swedish <sup>b</sup> | 0.63        | 0.03        | 0.84        | 0.06            | <0.00   | -     |
|                        | Swiss <sup>c</sup>   | 0.82        | 0.02        | 1.00        | 1.00            | 0.03    | -     |
| bayesglm <sup>a</sup>  | 0.73                 | 0.13        | 0.91        | 0.28        | 0.04            | -       |       |
|                        | Swedish <sup>b</sup> | 0.63        | 0.01        | 0.84        | 0.02            | <0.00   | -     |
|                        | Swiss <sup>c</sup>   | 0.87        | 0.37        | 0.99        | 0.86            | 0.46    | 0.009 |
| nn <sup>a</sup>        | 0.63                 | 0.14        | 0.78        | 0.16        | <0.00           | -       |       |
|                        | Swedish <sup>b</sup> | 0.56        | 0.21        | 0.68        | 0.18            | <0.00   | -     |
|                        | Swiss <sup>c</sup>   | 0.74        | 0.00        | 0.91        | 0.00            | <0.00   | -     |
| kNN <sup>a</sup>       | 0.74                 | 0.00        | 0.95        | 0.00        | <0.00           | -       |       |
|                        | Swedish <sup>b</sup> | 0.69        | 0.00        | 0.93        | 0.00            | <0.00   | -     |
|                        | Swiss <sup>c</sup>   | 0.82        | 0.00        | 1.00        | 0.00            | 0.00    | -     |
| pls <sup>a</sup>       | 0.77                 | 0.08        | 0.97        | 0.41        | 0.07            | -       |       |
|                        | Swedish <sup>b</sup> | 0.70        | 0.00        | 0.94        | 0.00            | <0.00   | -     |
|                        | Swiss <sup>c</sup>   | 0.86        | 0.24        | 0.99        | 0.92            | 0.34    | 0.04  |

281 Models in bold are considered as the best predictive models.

282 <sup>1</sup>Generalized Linear Model with Stepwise Feature Selection; <sup>2</sup>Random forest; <sup>3</sup>Support Vector Machines with Radial Basis Function Kernel;

283 <sup>4</sup>Bayesian Generalized Linear Model; <sup>5</sup>Neural network; <sup>6</sup>K-nearest neighbour; <sup>7</sup>Partial Least Squares Discriminant Analysis

284 <sup>a</sup>Prediction performances of the models on testing data set containing Swedish and Swiss data.

285 <sup>b</sup>Prediction performances of the models on the Swedish subset of the testing data set.

286 <sup>c</sup>Prediction performances of the models on the Swiss subset of the testing data set.

287

## 288 Impact of TB and analysis windows

289

290 We have tested the influence of the size of the analysis window and the size of the TB  
 291 window on predictive performances for the Swedish data set. Accuracy of models with analysis  
 292 windows of seven or 21, or with different TB windows (-49 to +10 days, or -10 to +5 days) were  
 293 compared with the default windows size (analysis window: 14 days; TB window: -35 to +10 days). The  
 294 RF model was chosen for this analysis, as it was the model with the best predictive performances  
 295 over the three data sets and for the two (CV and LOOP) approaches.  
 296 The predictive performances of the RF model increased when the analysis window contained 21 days  
 297 (instead of 14 days) or when the TB window was larger (-49 to +10 days) (Table 8). Interestingly, the  
 298 RF model never predicted TB class in CTL pens, thus ML models were able to discriminate CTL pen  
 299 behaviour from TB pen behaviour. In addition, the prediction of a TB event for a TB pen was almost  
 300 exclusively within the TB window (high accuracy). The detection of an upcoming TB event was not  
 301 better near the TB date (day 0) than at the beginning of the TB window (day -35, for default TB  
 302 window size).

303 **Table 8. Prediction performances of the random forest (rf) model depending on the TB and analysis**  
 304 **window size on the Swedish data set.**

|                              |                      | Swedish        |          |             |             |      |         |         |
|------------------------------|----------------------|----------------|----------|-------------|-------------|------|---------|---------|
| Test set                     | Analysis window size | TB window size | Accuracy | Sensitivity | Specificity | PPV  | Kappa   | p-value |
| Unseen analysis windows (CV) | 7 days               | [-35;10]       | 0.94     | 0.76        | 0.99        | 0.96 | 0.81    | <0.0001 |
|                              |                      | [-35;10]       | 0.94     | 0.70        | 0.99        | 0.96 | 0.78    | <0.0001 |
|                              | 14 days              | [-49;10]       | 0.97     | 0.88        | 0.99        | 0.97 | 0.90    | <0.0001 |
|                              |                      | [-10;5]        | 0.95     | 0.45        | 1.00        | 0.94 | 0.58    | <0.0001 |
| 21 days                      | [-35;10]             | 0.97           | 0.87     | 1.00        | 0.99        | 0.91 | <0.0001 |         |
| Unseen pens (LOOP)           | 7 days               | [-35;10]       | 0.64     | 0.00        | 0.87        | 0.00 | <0.00   | -       |
|                              |                      | [-35;10]       | 0.63     | 0.11        | 0.81        | 0.17 | <0.00   | -       |
|                              | 14 days              | [-49;10]       | 0.61     | 0.19        | 0.82        | 0.35 | 0.02    | -       |
|                              |                      | [-10;5]        | 0.91     | 0.00        | 1.00        | 0.00 | 0.00    | -       |
|                              | 21 days              | [-35;10]       | 0.66     | 0.00        | 0.88        | 0.00 | <0.00   | -       |

## 305 Discussion

306 In this study, TB events could be detected up to 35 days in advance using an ML model that  
 307 analysed feeding behaviours recorded by electronic feeders. Early indicators of TB events were more



308 easily identified when the model had access to previous records of the pen. Thus, one should  
309 consider performing continuous analysis of the data of each pen, even in the absence of TB events.  
310 To our knowledge, this is the first time an ML algorithm is able to predict TB events in pigs using  
311 feeding behaviour data.

312 In the following discussion, we compare the performances of our models with those of other  
313 models that predict TB events based on other behavioural changes. In the next section, we discuss  
314 the challenge of generalizing the model to a different farm data set. Then, we conclude by presenting  
315 an interpretation of the changes in feeding behaviour associated with a TB event.

## 316 **Performances evaluation**

317

318 This study obtained prediction performances comparable to studies that used drinking  
319 behaviour and climate data [22, 24], which obtained a specificity range of 44-72% and a sensitivity  
320 range of 59-100% for TB prediction. The approach taken by Larsen et al. to predict TB events  
321 deserves consideration [24]. They modelled different data sources (from drinking behaviour and  
322 climate conditions) with dynamic linear models (similar to [23]) and data were used by an artificial  
323 neural network to predict TB events, pen fouling and diarrhoea. As a parallel process, the different  
324 data sources were combined into a logistic regression model to estimate the probability of events,  
325 which was then converted to an event prediction based on a prediction threshold. Finally, these  
326 predictions were assembled in a Bayesian ensemble model to compute a final prediction.  
327 Accordingly, Domun et al. included climate ventilation system data and pig characteristics along with  
328 the same study data to compile three dynamic models and a long short-term memory neural  
329 network to forecast TB events, pen fouling, and diarrhea [22].

330 In the two studies cited above, data structures were different from those in the present  
331 study. Larsen et al. had a TB windows ranging from 1 to 3 days [24], while Domun et al. had an  
332 analysis window combining short-term memory (10 minutes beforehand) with long-term memory  
333 (up to 7 days) [22]. As noticed in our study, the authors observed that increasing the TB/analysis  
334 windows improved the prediction performances. The authors, however, did not include both analysis

335 and TB windows. The analysis window provided the possibility of detecting abnormal feeding  
336 behaviour, as well as recognizing abnormal progress over 14 days. A TB window offers the  
337 opportunity to predict an impending TB outbreak as it develops, even several days before signs of tail  
338 biting damage become evident.

## 339 **Model generalisation**

340 A system for detecting pigs' tail biting events is difficult to develop since pigs' behaviors tend to be  
341 complex because of the multifactorial causes of tail biting. There is no clear answer about what  
342 prediction method or pattern can be used for detecting specific events. It seems that the feeding  
343 behaviour is not only specific to a pen, but each site has its own characteristics (e.g., breeds,  
344 climates, and feed compositions). The model trained on one data set (Swedish or Swiss) was not able  
345 to detect events in the other data set, and the combination of the data sets (Swedish + Swiss) had  
346 little effect on model performances. As a result, the combined Swedish and Swiss data did not  
347 provide many advantages. It is difficult to generalize feature-based models to unseen data, as health  
348 and welfare problems often differ between herds and meaningful features are sometime hard to  
349 identify [22]. One explanation could be linked to site-specific risk factors. As acknowledged by the  
350 European Food Safety Authority in 2014, one of the difficulties in preventing TB resides in the fact  
351 that every farm is different and has its own risk factors. Prevention strategies therefore need to be  
352 designed at a farm-specific level [5]. Feeding behaviour associated with a TB event will differ  
353 depending on the chronic risk factors on the farm (breed, sex, feeding, and access to manipulable  
354 material, space, and group size). This observation was already acknowledged by Taylor et al. [33] and  
355 Valros [4], when they defined the four types of TB (two-stage, sudden-forceful, obsessive, and  
356 epidemic), associated with four putative causations. For these authors, the two-stage type is the  
357 result of chronic and moderate stress. Competition for resources is thought to cause sudden-forceful  
358 types. And generally, the epidemic type occurs after a significant change in the pig's daily routine  
359 (e.g., food disturbance, temperature change). The obsessive type is caused by one individual pig (the  
360 tail biter) that possibly experience long-term challenges.

## 361 **Understanding changes in feeding behaviour**

362 Previously, Munsterhjelm et al. [16] investigated feeding behaviours of pigs 70 days before  
363 and 28 days after the TB event was detected in a pen. Feeding behaviours in TB pens were compared  
364 to matched CTL pens. Pigs in TB pens tend to visit the feeder less frequently than pigs in CTL pens.

365 Pigs in TB pens also had less time spent at the feeder, as well as a lower daily feed consumption  
366 (DFC). This tendency persisted after the TB date, and pigs continued to spend less time in the feeder  
367 and visit less frequently, even if the difference from the control group decreased with time. Pigs also  
368 tended to eat faster (more intake per second). They concluded that the rapid change in feeding  
369 behaviour suggests that TB behaviour escalates 14 days before the TB date.

370 The change in feeding behaviour in the TB pen was also observed by Tessier et al. [19] during  
371 a TB outbreak in a pen. Specifically, they studied the evolution of DFV, the DFC and feeding time  
372 seven days before (pre-injury phase), seven days during (acute phase), and seven days after  
373 (recovery phase) the TB outbreak. The DFV decreased before the TB date, reached a minimum during  
374 the outbreak, and increased during the recovery phase. As the TB outbreak progressed (during the  
375 pre-injury and acute phases), the consumption time (for an equivalent amount of feed eaten)  
376 decreased and remained low during the recovery phase. This study confirms that a change in feeding  
377 behaviour in a pen can indicate future TB. This also confirms the gradual change of the feeding  
378 behaviour over time, reaching its maximum at the TB date.

379 In addition, Wallenbeck et al.'s statistical analysis of the Swedish data set revealed a  
380 significant decrease in DFV 42 to 63 days before the TB event, when compared to matched CTL pens  
381 [20]. The DFC was also always reduced in TB pens compared to CTL pens. This difference in feeding  
382 behaviour between CTL and TB pens must have been noticed in the current analysis by the ML  
383 models, which never predicts TB class in CTL pens. However, both studies did not have the same  
384 reference. The Wallenbeck study compared TB pens to matching CTL pens in an attempt to identify  
385 eating behaviour predictive of a future TB occurrence [20]. The present analysis used each pen as its  
386 own control, as a TB pen was categorised in the TB class when inside the TB window but in CTL when  
387 outside. The model could not only detect feeding behaviour that is typical of a future TB event but  
388 also changes in feeding behaviour over time that are indicative of TB events. Indeed, a drastic change  
389 in feeding behaviour is also indicative of an upcoming TB event [18, 19]. Furthermore, the current  
390 approach takes into account a combination of three feeding behaviour metrics (DFV, DFC, and

391 StdFC), improving the likelihood of detecting TB episodes. In a comprehensive book chapter on TB,  
392 Valros describes the gradual change in feeding behaviour until the TB date [4]. Daily Feeder Visit can  
393 begin to decline months to weeks before the TB date, but DFC appears to be impacted just six days  
394 before a TB event [4]. As a result, combining these two indications should increase the model's  
395 accuracy.

## 396 **Conclusion and future work**

397 The sensitivity and specificity of certain models (e.g. RF) are very promising, but prediction  
398 performances (especially sensitivity) could still be improved using an ensemble model for binary class  
399 classification following the model developed by Iwendi et al.[34]. In addition, the same data  
400 framework, i.e., a 14 days analysis window combined with a [-35-10] days TB window could be  
401 analysed by an elaborate neural network model like long short-term memory recurrent neural  
402 network for improved sensitivity. Furthermore, an increased sensitivity rate could potentially be  
403 achieved by combining predictions using feeding behaviour data with predictions using other data  
404 sources, such as tail position.

405 In conclusion, a ML model can be deployed in farms with automatic feeders to detect early  
406 indicators of TB behaviour at least 35 days before the actual TB event. Thanks to these early  
407 warnings, farmers could implement measures to prevent the occurrence of the TB event—for  
408 example, by adding more straw as occupational material. Farmers could also start a TB risk analysis  
409 to identify the reasons why pigs are disturbed. Continuous implementation of the model on farms  
410 would also lead to improved prevention of TB events, serving the welfare of the pigs and bringing an  
411 economic benefit to the farmers. Finally, this ML approach could also be a useful tool by allowing the  
412 systematic study of the effectiveness of different intervention strategies under controlled conditions.

413

## 414 References

415

416

417

418 1. Brunberg EI, Rodenburg TB, Rydhmer L, Kjaer JB, Jensen P, Keeling LJ. Omnivores  
419 Going Astray: A Review and New Synthesis of Abnormal Behavior in Pigs and Laying Hens.  
420 Front Vet Sci. 2016;3(57). doi: 10.3389/fvets.2016.00057.

421 2. EFSA. Scientific opinion concerning a multifactorial approach on the use of animal  
422 and non-animal-based measures to assess the welfare of pigs. EFSA J. 2014, 3702.

423 3. Larsen MLV, Andersen HM-L, Pedersen LJ. Can tail damage outbreaks in the pig be  
424 predicted by behavioural change? Vet J. 2016;209:50-6. doi:

425 <https://doi.org/10.1016/j.tvjl.2015.12.001>.

426 4. Valros A. Chapter 5 - Tail biting. In: Špinko M, editor. Advances in Pig Welfare:  
427 Woodhead Publishing; 2018. p. 137-66.

428 5. EFSA. Pig welfare risks associated with tail biting. EFSA J. 2007, 611.

429 6. Ordonnance sur la protection des animaux, Swiss Federal Food Safety and  
430 Veterinary Office. 2008,455.1.

431 7. Minimum standards for the protection of pigs, Swiss Federal Food Safety and  
432 Veterinary Office. 2008.

433 8. D'Eath RB, Jack M, Futro A, Talbot D, Zhu Q, Barclay D, et al. Automatic early  
434 warning of tail biting in pigs: 3D cameras can detect lowered tail posture before an outbreak.  
435 PLOS ONE. 2018;13(4). doi: 10.1371/journal.pone.0194524.

436 9. Lahrmann HP, Hansen CF, D'Eath R, Busch ME, Forkman B. Tail posture predicts  
437 tail biting outbreaks at pen level in weaner pigs. Appl Anim Behav Sci. 2018;200:29-35. doi:

438 <https://doi.org/10.1016/j.applanim.2017.12.006>.

439 10. Wedin MB, Baxter EM, Jack M, Agnieszka F, D'Eath RB. Early indicators of tail biting  
440 outbreaks in pigs. Appl Anim Behav Sci. 2018;208:7-13. doi:

441 <https://doi.org/10.1016/j.applanim.2018.08.008>.

442 11. Statham P, Green L, Bichard M, Mendl M. Predicting tail-biting from behaviour of pigs  
443 prior to outbreaks. Appl Anim Behav Sci. 2009;121:157-64. doi:

444 [10.1016/j.applanim.2009.09.011](https://doi.org/10.1016/j.applanim.2009.09.011).

445 12. Zonderland JJ, van Riel JW, Bracke MBM, Kemp B, den Hartog LA, Spooler HAM.  
446 Tail posture predicts tail damage among weaned piglets. Appl Anim Behav Sci.

447 2009;121(3):165-70. doi: <https://doi.org/10.1016/j.applanim.2009.09.002>.

448 13. Ursinus WW, Van Reenen CG, Kemp B, Bolhuis JE. Tail biting behaviour and tail  
449 damage in pigs and the relationship with general behaviour: Predicting the inevitable? Appl  
450 Anim Behav Sci. 2014;156:22-36. doi: <https://doi.org/10.1016/j.applanim.2014.04.001>.

451 14. Larsen MLV, Andersen HM, Pedersen LJ. Changes in activity and object  
452 manipulation before tail damage in finisher pigs as an early detector of tail biting. Animal.

453 2019;13(5):1037-44. doi: 10.1017/s1751731118002689.

454 15. Wallgren T, Larsen A, Gunnarsson S. Tail Posture as an Indicator of Tail Biting in  
455 Undocked Finishing Pigs. Animals. 2019;9(1):18. doi: 10.3390/ani9010018.

456 16. Liu D, Oczak M, Maschat K, Baumgartner J, Pletzer B, He D, et al. A computer vision-  
457 based method for spatial-temporal action recognition of tail-biting behaviour in group-housed  
458 pigs. Biosys Eng. 2020;195:27-41. doi: <https://doi.org/10.1016/j.biosystemseng.2020.04.007>.

459 17. Young R, Lawrence A. Feeding behaviour of pigs in groups monitored by a  
460 computerized feeding system. Anim Prod. 1994;58:145-52. doi:

461 [10.1017/S0003356100007182](https://doi.org/10.1017/S0003356100007182).

462 18. Munsterhjelm C, Nordgreen J, Heinonen M, Janczak A, Valros A, editors. Feeding  
463 behaviour and performance in relation to injurious tail biting in boars – a longitudinal study.  
464 7th ESPHM, Dublin, Ireland; 2016; Dublin, Ireland.

465 19. Tessier F, Maikoff G, Bee G, Ollagnier C, editors. Tail biting in switzerland: a  
466 retrospective study. 51eme journées de la recherche porcine- JRP; 2019; Paris.

467 20. Wallenbeck A, Keeling LJ. Using data from electronic feeders on visit frequency and  
468 feed consumption to indicate tail biting outbreaks in commercial pig production. J of Anim  
469 Sci. 2013;91(6):2879-84. doi: 10.2527/jas.2012-5848.

- 469 21. Maselyne J, Nuffel AV, Briene P, Vangeyte J, Ketelaere BD, Millet S, et al. Online  
470 warning systems for individual fattening pigs based on their feeding pattern. *Biosys Eng.*  
471 2017;173:143-56.
- 472 22. Domun Y, Pedersen LJ, White D, Adeyemi O, Norton T. Learning patterns from time-  
473 series data to discriminate predictions of tail-biting, fouling and diarrhoea in pigs. *Comput*  
474 *Electron Agric.* 2019;163:104878. doi: <https://doi.org/10.1016/j.compag.2019.104878>.
- 475 23. Jensen DB, Toft N, Kristensen AR. A multivariate dynamic linear model for early  
476 warnings of diarrhea and pen fouling in slaughter pigs. *Comput Electron Agric.* 2017;135:51-  
477 62. doi: <https://doi.org/10.1016/j.compag.2016.12.018>.
- 478 24. Larsen MLV, Pedersen LJ, Jensen DB. Prediction of Tail Biting Events in Finisher  
479 Pigs from Automatically Recorded Sensor Data. *Animals.* 2019;9(7):458. doi:  
480 10.3390/ani9070458.
- 481 25. Andersson C, Lindberg JE. Forages in diets for growing pigs 1. Nutrient apparent  
482 digestibilities and partition of nutrient digestion in barley-based diets including lucerne and  
483 white-clover meal. *Animal Science.* 1997;65(3):483-91. doi: 10.1017/S1357729800008687.
- 484 26. Agroscope. Apports alimentaires recommandés pour les porcs (livre jaune) 2005  
485 [cited 2020].
- 486 27. Kuhn M. Building Predictive Models in R Using the caret Package. *J Stat Softw.* 2008.  
487 doi: 10.18637/jss.v028.i05.
- 488 28. Iwendi C, Khan S, Anajemba JH, Bashir AK, Noor F. Realizing an Efficient IoT-  
489 Assisted Patient Diet Recommendation System Through Machine Learning Model. *IEEE*  
490 *Access.* 2020;8:28462-74. doi: 10.1109/ACCESS.2020.2968537.
- 491 29. Rajput DS, Basha SM, Xin Q, Gadekallu TR, Kaluri R, Lakshmana K, et al. Providing  
492 diagnosis on diabetes using cloud computing environment to the people living in rural areas  
493 of India. *J Ambient Intell Humaniz Comput.* 2021. doi: 10.1007/s12652-021-03154-4.
- 494 30. Molinaro AM, Simon R, Pfeiffer RM. Prediction error estimation: a comparison of  
495 resampling methods. *Bioinformatics.* 2005;21(15):3301-7. doi: 10.1093/bioinformatics/bti499.
- 496 31. Tharwat A. Classification Assessment Methods: a detailed tutorial. 2018. doi:  
497 10.1016/j.aci.2018.08.003.
- 498 32. Landis JR, Koch GG. An Application of Hierarchical Kappa-type Statistics in the  
499 Assessment of Majority Agreement among Multiple Observers. *Biometrics.* 1977;33(2):363-  
500 74. doi: 10.2307/2529786.
- 501 33. Taylor NR, Main DC, Mendl M, Edwards SA. Tail-biting: a new perspective. *Vet J.*  
502 2010;186(2):137-47. doi: 10.1016/j.tvjl.2009.08.028.
- 503 34. Iwendi C, Khan S, Anajemba JH, Mittal M, Alenezi M, Alazab M. The Use of  
504 Ensemble Models for Multiple Class and Binary Class Classification for Improving Intrusion  
505 Detection Systems. *Sensors.* 2020;20(9):2559. doi:10.3390/s20092559.
- 506

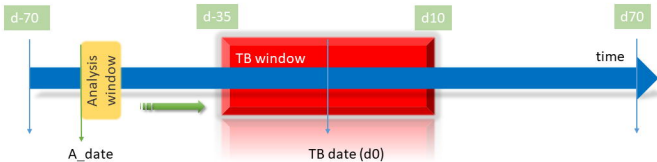

Source: https://www.biorxiv.org/content/10.1101/2021.05.11.443554v2.full.pdf
